1 **Trophic specialization on unique resources in one of the most celebrated**  
2 **examples of sympatric speciation, Barombi Mbo crater lake cichlids**

3

4 Jacquelyn R. Galvez<sup>1,2</sup>, Keara McLean<sup>3</sup>, Cyrille Dening Touokong<sup>4</sup>, Legrand Nono Gonwouo<sup>5</sup>,  
5 Christopher H. Martin<sup>1,2</sup>

6

7 <sup>1</sup>Department of Integrative Biology, University of California, Berkeley, CA, USA

8 <sup>2</sup>Museum of Vertebrate Zoology, University of California, Berkeley, CA, USA

9 <sup>3</sup>Department of Biology, University of North Carolina at Chapel Hill, Chapel Hill, NC, USA

10 <sup>4</sup>Gulf Aquatics, Inc., P.O. Box: 8647, Douala-Cameroon

11 <sup>5</sup>Laboratory of Zoology, Faculty of Science, University of Yaoundé I, P.O. Box 812, Yaoundé,  
12 Cameroon

13

14 Key words: dietary niche partitioning, dietary specialization, sympatric speciation, ecological  
15 divergence, competition, adaptive radiation

16 Correspondence: [chmartin@berkeley.edu](mailto:chmartin@berkeley.edu)

17

18

19

20

21

22

23

24 **ABSTRACT**

25 Divergent ecological selection often results in trophic niche partitioning and is one of the central  
26 processes underlying sympatric speciation. However, there are still few studies of niche  
27 partitioning in putative examples of sympatric speciation in the wild. Here we conducted the first  
28 quantitative study of dietary niche partitioning in one of the most celebrated examples of sympatric  
29 speciation, Barombi Mbo cichlids, using stomach contents and stable isotope analyses. We found  
30 little evidence for trophic niche partitioning among any Barombi Mbo cichlids, even among the  
31 nine species coexisting in sympatry in the littoral zone. Stable isotope analyses supported these  
32 conclusions of minimal dietary overlap. However, we did find extraordinary dietary specialization  
33 in some species, including spongivory and feeding on terrestrial ants, both unique feeding  
34 strategies among freshwater fishes. Stomach contents of the spongivore (*Pungu maclareni*) were  
35 20% freshwater sponge, notable considering that only 0.04% of all fishes consume sponges.  
36 Overall, we conclude that while there is less trophic niche partitioning than expected among  
37 Barombi Mbo cichlids, there is evidence for dietary specialization on rare resources in support of  
38 Liem's paradox.

39

40

41

42

43

44

45

46

## 47 INTRODUCTION

48 All adaptive radiations display some level of niche partitioning, a phenomenon in which groups of  
49 organisms in a shared environment shift their resource use to reduce niche overlap. While  
50 phylogenetic niche conservatism results in ecological similarities among closely related species  
51 (McNyset 2009, Losos 2008), adaptive radiations represent the opposite extreme in which rapidly  
52 diversifying species occupy a diverse suite of ecological niches (Schulter 2000, Martin & Richards  
53 2019, Stroud & Losos 2020). Trophic niche partitioning in particular can allow for the coexistence  
54 of similar species by reducing interspecific competition for limited food resources (Ross 1986,  
55 Winemiller & Pianka 1990, Correa & Winemiller 2014, Varghese *et al.* 2014). When such niche  
56 shifts coincide with traits under disruptive selection and assortative mating, dietary niche  
57 partitioning can contribute to ecological speciation in sympatry (Dieckmann and Doebeli 1999,  
58 Gavrilets 2004, Gavrilets & Losos 2009). Examples of this phenomenon include experimental  
59 evolution studies (Blount *et al.* 2008), divergence of insect host races (Nosil 2009), and ecological  
60 speciation in classic adaptive radiations (Grant and Grant 2002; Kocher *et al.* 2004; Lamichhaney  
61 *et al.* 2015; Gillespie *et al.* 2020). The fine-scale study of dietary niche partitioning and  
62 specialization during adaptive radiation can offer further insight into the prevalence and  
63 mechanisms of the processes driving ecological speciation.

64 African cichlids are widely regarded as a model system for studying adaptive radiation.  
65 The species flocks of Lakes Malawi, Victoria, and Tanganyika in particular contain dietary  
66 specialists and closely related species that exhibit varying levels of trophic niche partitioning  
67 (Kocher 2004; Martin and Genner 2009; Wagner *et al.* 2009). Despite this, dietary specialization  
68 is rarely invoked as the driver of speciation in African cichlids. Habitat partitioning (Albertson  
69 2008; Conith *et al.* 2020) and sexual selection (Seehausen 2000; Poelstra *et al.* 2018) are

70 hypothesized to play a much greater role in the observed ecological diversity of these lineages. In  
71 fact, there is considerable dietary overlap among many sympatric rock-dwelling Malawi cichlids  
72 (Ribbink et al. 1983; Reinthal 1990; Genner *et al.* 1999a; Genner *et al.* 1999b; Martin & Genner  
73 2009), suggesting that many closely related cichlid species can coexist without strong ecological  
74 segregation. It has long been recognized in Lake Malawi that closely related species often show  
75 minimal or undetectable ecological differentiation, despite substantial differences in trophic  
76 morphology (Liem 1980). This is known as Liem’s paradox: trophic specialists act as “jacks-of-  
77 all-trades” able to consume both their narrow food source as well as a more generalist diet (Liem  
78 1980). A rare exception is observed in the *Alcolapia* species flock of the alkaline Lake Natron  
79 (Seegers & Tichy 1999). These three herbivorous species exhibit fine-scale trophic and  
80 ecomorphological differences despite limited genomic differentiation, suggesting the importance  
81 of trophic niche partitioning in the diversification of this clade (Ford *et al.* 2016).

82 Another African cichlid radiation displaying evidence of trophic niche partitioning is in  
83 crater lake Barombi Mbo, Cameroon. This species flock of 11 endemic cichlids is celebrated as a  
84 putative example of sympatric speciation in nature and its discovery led to a revival of empirical  
85 and theoretical interest in this process (Turelli *et al.* 2001; Schliewen *et al.* 1994; Schliewen and  
86 Klee 2004; Coyne & Orr 2004; Bolnick & Fitzpatrick 2007; Richards *et al.* 2019). However, recent  
87 work on this system has revealed a complex history of gene flow between Barombi Mbo cichlids  
88 and riverine outgroups (Martin *et al.* 2015), with introgression from multiple colonizations  
89 potentially contributing to the speciation process (Richards *et al.* 2018).

90 More directly relevant to niche partitioning, there is also evidence for weak disruptive  
91 selection within Barombi Mbo cichlids (Martin 2012). Strong disruptive selection is necessary in  
92 all theoretical models of sympatric speciation to drive the evolution of reproductive isolation

93 between ecotypes (Dieckmann & Doebeli 1999; Gavrilets 2004; Otto et al. 2008). Compared to  
94 the predicted strength of disruptive selection necessary for sympatric speciation (Dieckmann and  
95 Doebeli 1999; Bolnick 2011) and empirical estimates of disruptive selection in nature (Kingsolver  
96 *et al.* 2001), cichlids of the Barombi Mbo genus *Stomatepia* displayed relatively weak levels of  
97 disruptive selection for all trophic morphology traits measured (Martin 2012). While trophic  
98 divergence in *Stomatepia* has been previously reported for stable isotope data (Martin 2012),  
99 divergence in overall dietary profiles—i.e. stomach contents—has not been assessed since  
100 Trewavas *et al.* (1972). Unlike the cichlids of Cameroonian Lake Ejagham—another endemic  
101 cichlid lake radiation recognized as an example of sympatric speciation—in which olfactory  
102 preferences and sexual selection are hypothesized to drive divergence (Martin 2013; Poelstra *et al.*  
103 2018), striking differences among sympatric species in trophic morphology and no sexual  
104 dimorphism in ten out of the eleven species in Barombi Mbo suggest that diet could be the primary  
105 driver of ecological speciation. Previous qualitative descriptions of diet indicated differences in  
106 dietary profiles among some species and identified species that fed heavily on plants and  
107 freshwater sponges (Trewavas *et al.* 1972).

108         In this study, we investigated patterns of trophic niche partitioning and specialization  
109 among Barombi Mbo cichlids, namely through stomach content and stable isotope analyses. We  
110 used stomach content analyses to quantify differences in dietary item proportions, niche width and  
111 overlap, and overall dietary composition. We also used stable isotope analyses to investigate  
112 relative trophic levels and carbon source differences among species over a longer timeframe than  
113 the “snapshot” provided by stomach content data. Investigating dietary and trophic differences and  
114 specialization among Barombi Mbo cichlids is the first step in examining whether diet is the  
115 primary driver of sympatric speciation in this system.

116

## 117 **METHODS**

### 118 Study site and sample collection

119 Barombi Mbo is a 1 Mya volcanic crater lake (Cornen *et al.* 1992) in southwestern Cameroon. It  
120 is roughly circular in shape with a diameter of 2.5 km and a maximum depth of 110 m, but the  
121 oxic zone only reaches to 30 m (Trewavas *et al.* 1972; Cornen *et al.* 1992; Musilova *et al.* 2019).  
122 We collected samples in December 2009 through January 2010, and in July through December,  
123 2016 from several localities in the lake using a 6 x 2 m seine net with 0.5 cm<sup>2</sup> mesh. *Sarotherodon*  
124 *linnellii* and *Konia dikume* were caught by artisanal fishers using gill nets. We collected all 11  
125 endemic Barombi Mbo cichlid species. We euthanized captured fish with an overdose of MS-222  
126 and immediately took a 5 mg muscle tissue sample from the caudal peduncle for stable isotope  
127 analysis. Muscle samples were desiccated individually with magnesium perchlorate in airtight  
128 vials following Martin (2012; 2013). Specimens were then individually labeled and fixed in 95-  
129 100% ethanol. Field procedures followed approved protocols by the Institutional Animal Care and  
130 Use Committees of the University of California, Davis and the University of North Carolina at  
131 Chapel Hill.

132

### 133 Stomach content analyses

134 In total, we selected 241 individuals for stomach content analysis, including at least 8 individuals  
135 from each species. Nine out of the lake's 11 endemic cichlid species were analyzed in this study,  
136 all except *Sarotherodon caroli* and *Sarotherodon lohbergeri*, which are morphologically and  
137 ecologically similar to *Sarotherodon steinbachi*. We removed the entire stomach and intestine  
138 from each individual. We then placed stomach contents or a subset of the intestine on a Sedgwick-

139 Rafter cell containing 1 x 1 mm squares for visualization and quantification under a  
140 stereomicroscope. Dietary proportions were based upon a visual volume estimation method  
141 (Hyslop 1980; Manko 2016). We compressed stomach contents to a uniform thickness (approx.  
142 0.5 mm) and estimated the surface area of each prey item by counting the number of 1 mm<sup>2</sup> squares  
143 covered by the item (Hyslop 1980; Gelwich & McIntyre 2017). Smaller items were assigned  
144 fractions of a square to the nearest 0.1 mm<sup>2</sup>. This number was then divided by the total number of  
145 squares covered by all diet items for that individual to calculate individual dietary proportions for  
146 each item. Proportions were rounded to the nearest 0.001 and are reported as percentages.

147 We identified all diet items based on partially digested remnants, including exoskeletal  
148 remains, plant matter, and sponge spicules; unidentified organic matter was classified as detritus  
149 and inorganic matter, such as particles of sand, was classified as silt. All prey items were grouped  
150 into taxa, usually to the level of class or family. Diet categories were comparable to previously  
151 identified prey items of Barombi Mbo cichlids described in Trewavas *et al.* (1972). We used 13  
152 diet categories in total: ants, *Corvospongilla spp.* sponge, Dipteran larvae, Ephemeropteran larvae,  
153 Trichopteran larvae, fish, gastropod shell, nematode, plant tissue, shrimp, detritus, silt, and  
154 unidentified. Ants were identified by distinct head capsules of species within Formicidae, which  
155 likely originated from terrestrial debris that fell into the lake. The sponge category consisted of  
156 two members of the genus *Corvospongilla*: *C. thysi*, endemic to Barombi Mbo, and closely related  
157 *C. bohmi* (Trewavas *et al.* 1972). Both species are found in the lake's shallow waters (up to 3-4  
158 m depth), with *C. thysi* typically covering the outer surfaces of rocks and *C. bohmi* found in  
159 crevices (Trewavas *et al.* 1972). Dipteran larvae included larval forms of the midge families  
160 Chaoboridae and Chironomidae. Ephemeropteran larvae included larval forms of various mayfly  
161 families Baetidae and Caenidae. This category also included larvae of the common burrowing

162 mayfly species *Povilla adusta*, previously identified by Trewavas *et al.* (1972) to be present on  
163 both stones and fallen logs in Barombi Mbo. Trichopteran larvae consisted of caddisflies in their  
164 larval form, likely from the genus *Triaenodes*, which has many species endemic to West Africa  
165 (Andersen & Holzenthal 2002). The fish category was assigned to portions of fish fins and tissue,  
166 as well as to whole fry found in individuals' stomachs (not identifiable to the species level at this  
167 size). The gastropod shell category consisted of shell remains from various snails, including  
168 freshwater limpets from the genus *Ferrissia* (Trewavas *et al.* 1972). The nematode category  
169 contained all roundworms, likely including both terrestrial and aquatic species. The plant tissue  
170 category was assigned to all plant material found in individuals' stomachs. This included aquatic  
171 species such as *Najas pectinate* and *Potamogeton octandrus* previously documented in Barombi  
172 Mbo (Trewavas *et al.* 1972) and any terrestrial plant leaves. The shrimp category consisted of  
173 *Caridina spp.* and *Macrobrachium spp.*, freshwater shrimp genera found in Barombi Mbo and  
174 throughout Cameroon (Trewavas *et al.* 1972). Detritus was used as a catch-all term to describe  
175 organic matter that was digested beyond the point of identification. Silt was used as a catch-all to  
176 describe inorganic materials, including rocks and sand. Animal remains that could not be clearly  
177 identified (e.g. egg-like structures) were grouped into the unidentified category.

178 We estimated dietary niche breadth of each species by calculating Levins' standardized  
179 index (Levins 1968) and Pianka's measure of dietary niche overlap (Pianka 1973) using the *smaa*  
180 package (Zhang 2016) in R (version 4.0.2). Individuals with empty stomachs were excluded from  
181 all calculations ( $n = 38$ ).

182

183 Stable isotope analyses



184 To assess relative trophic positions of Barombi Mbo cichlids, we performed stable isotope analyses  
185 for all 11 species (including *S. caroli* and *S. lohbergi*). In limnetic systems,  $\delta^{13}\text{C}$  isotope ratios  
186 offer insight into the ultimate carbon source of prey consumed (Post 2002). Higher  $\delta^{13}\text{C}$  values  
187 indicate a more littoral carbon source, while lower values indicate a more pelagic source (Post  
188 2002).  $\delta^{15}\text{N}$  ratios indicate the relative trophic position of individual consumers (Post 2002). In  
189 total, we selected 180 individuals for stable isotope analysis, including at least 6 individuals from  
190 each species. Field samples desiccated with magnesium perchlorate in individual vials were  
191 subsequently dehydrated at  $60^\circ\text{C}$  for at least 24 hours, then 1 mg samples were weighed to the  
192 nearest 0.0001 g, packaged into tinfoil capsules, and sent to the UC Davis Stable Isotope Facility.  
193  $^{13}\text{C}$  and  $^{15}\text{N}$  isotopes were measured on a PDZ Europa ANCA-GSL elemental analyzer interfaced  
194 to a PDZ Europa 20–20 isotope ratio mass spectrometer (Sercon Ltd., Cheshire, U.K.).

195

#### 196 Statistical analyses

197 Individuals with empty stomachs ( $n = 38$ ) were excluded from all statistical analyses of stomach  
198 contents, leaving a final sample size of  $n = 203$ . The sample size for each species is reported in  
199 Table 1. We performed all statistical analyses in R version 4.0.2 (R Core Team 2020).

200 To visualize overall dietary similarity among species, we estimated a non-metric  
201 multidimensional scaling (NMDS) plot from a Bray-Curtis dissimilarity matrix of dietary  
202 proportions for each individual. To test for differences in diet among species, we used analysis of  
203 similarities (ANOSIM) with species designated as the grouping variable. To determine which  
204 dietary components significantly contributed to the stomach contents of each species, we  
205 performed an indicator species analysis (Defrêne & Legendre 1997; Cácaeres & Legendre 2009).  
206 This analysis has traditionally been used to identify one or more species characterizing various

207 habitats or sites in ecological studies (Defrêne & Legendre 1997). More recently, it has been used  
208 in dietary studies to identify diet items significantly contributing to differences in stomach contents  
209 between groups (Hertz *et al.* 2017; Lee *et al.* 2018; Thalmann *et al.* 2020). These visualizations  
210 and analyses were performed in R using the *vegan* (Oksanen *et al.* 2019) and *indicspecies* (Cáceres  
211 & Legendre 2009) packages.

212 To determine whether individual dietary proportions varied by species, we used  
213 generalized linear models (GLMs). All GLMs were fitted using the *stats* package in R (R Core  
214 Team 2020). Dietary proportions were first transformed using the arcsine (also known as arcsine  
215 square root) transformation typical for proportional data. We fit a separate model for each dietary  
216 item after arcsine-transformation of the proportions. The independent variable was species with  
217 log-transformed standard length (SL) as a covariate. A normal distribution was used for all models.  
218 To test the significance of each model, we performed an ANOVA with Type III sum of squares  
219 using the *car* package (Fox & Weisberg 2019) in R. For significant models, we used Tukey's HSD  
220 post hoc analysis for pairwise comparisons between species. Post-hoc analyses were conducted  
221 using the *stats* package in R.

222 Since volume-based dietary proportions are highly variable depending on prey condition  
223 (Buckland *et al.* 2017), we decided to additionally analyze our stomach content data using a  
224 frequency of occurrence approach. To determine whether presence/absence of dietary components  
225 varied by species, we fit GLMs using a binomial distribution. The proportional response variable  
226 was converted into binomial success (proportion > 0) and failure (proportion = 0) and then all  
227 models were fit as described above.

228 To determine whether stable isotope content varied by species, we fit GLM models for  
229 both  $\delta^{15}\text{N}$  and  $\delta^{13}\text{C}$ . We fit models including all 11 Barombi Mbo cichlids and models including

230 only the three *Stomatepia* species. The response variable for each was  $\delta^{15}\text{N}$  and  $\delta^{13}\text{C}$ , respectively,  
231 and the independent variable was species. A normal distribution was used for all models. To test  
232 the significance of each model, we performed an ANOVA with Type III sum of squares. We used  
233 Tukey's HSD post hoc analysis for pairwise comparisons between species.

234

## 235 **RESULTS**

### 236 Dietary composition and niche breadth

237 We found a majority of Barombi Mbo cichlids consumed detritus, plant tissue, and aquatic insects  
238 (Fig. 2). Detritus was the majority (>50%) dietary component in all species except for *S. mongo*  
239 (Table 1; Fig. 2). Notably, *Myaka myaka* was the only species with stomach contents consisting  
240 of 100% detritus (Table 1), potentially reflecting rapid digestion of its specialized *Chaoborus*  
241 larvae diet (Trewavas et al. 1972) into unidentifiable organic matter or capture in 2016 during the  
242 summer lekking season when reproductive males may invest all their time in courting females  
243 rather than foraging. *Konia eisentrauti* consumed the largest percentage of plant tissue (22.8%)  
244 across all species (Table 1; Fig 3). While *Pungu maclareni* and all three *Stomatepia* species  
245 consumed shrimp, *Stomatepia mongo* consumed the greatest proportion of shrimp (62.9%) among  
246 all species (Table 1; Fig. 1 & 3). This may reflect the rare hunting strategy of this species for  
247 nocturnal shrimp prey (also see Lloyd *et al.* 2021 for a nocturnal Malawi cichlid). *S. mongo* were  
248 only observed and captured by seine net after twilight hours beginning around 19:00 hours. Most  
249 species also had unidentified material in their stomach contents, although this percentage was  
250 typically under 15% on average (Table 1). However, *S. steinbachi* contained the highest percentage  
251 (38.3%) of unidentified material (Table 1), specifically egg-like structures that could not be  
252 identified.

253 Several dietary components were much rarer and found in only one or two cichlid species.  
254 *S. linnellii*, the largest species in the radiation, and *Stomatepia mariae* were the only two species  
255 to consume fish (Table 1; Fig. 1). *P. maclareni* was the only species to consume gastropod shells  
256 and *Corvospongilla* sponge spicules, with the latter component making up about 20% of this  
257 species' diet on average (Table 1; Fig. 1). *S. mariae* was the only species to consume ants,  
258 comprising about 10% of this species' diet on average (Table 1; Fig. 1). While insect larvae from  
259 the orders Ephemeroptera and Diptera were found in the stomach contents of several species, only  
260 *Stomatepia pindu* consumed Trichopteran larvae (Table 1; Fig. 2), comprising about 14% of this  
261 species' diet on average (Table 1; Fig. 1).

262 *S. linnellii* had the widest niche breadth among all species, whereas *M. myaka* had the  
263 smallest (Table 1). Many species displayed considerable dietary niche overlap, with Pianka index  
264 values typically ranging from 0.8-1 (Table 2). Notably, *S. mongo* showed the lowest niche overlap  
265 with other species, with Pianka index values from 0.2-0.35 (Table 2), possibly reflecting the  
266 combination of both temporal and trophic niche divergence in this species.

267

#### 268 Clustering, analysis of similarities, and indicator analyses of overall diet

269 The NMDS ordination (stress = 0.103) displayed little clustering of species by dietary components,  
270 with considerable overlap among species (Fig. 3). However, there was a statistically significant  
271 difference in overall diet among species (ANOSIM:  $R = 0.06275$ ,  $P = 0.0238$ ).

272 We identified several dietary items that significantly predicted species identity. Detritus  
273 was a significant indicator of *K. dikume*, *M. myaka*, and *S. linnellii* (indicspecies: Dufrêne-  
274 Legendre indicator value = 0.454,  $P = 0.0097$ ). Plant tissue was a significant indicator of *K.*  
275 *eisentrauti* (Dufrêne-Legendre Indicator = 0.438,  $P = 0.0199$ ); shrimp was a significant indicator

276 of *S. mongo* (Dufrêne-Legendre Indicator = 0.744,  $P = 0.0003$ ); *Corvospongilla* sponge was a  
277 significant indicator of *P. maclareni* (indicspecies: Dufrêne-Legendre indicator value = 0.49,  $P =$   
278 0.0153); ants were a significant indicator of *S. mariae* (indicspecies: Dufrêne-Legendre indicator  
279 value = 0.405,  $P = 0.0448$ ); and Trichopteran larvae were a significant indicator of *S. pindu*  
280 (indicspecies: Dufrêne-Legendre indicator value = 0.457,  $P = 0.0271$ ).

281

### 282 Individual dietary components

283 We found individual diet proportions to vary by species for several items (Fig. 1). Detritus  
284 consumption was significantly different among species (ANOVA:  $\chi^2 = 36.242$ ,  $df = 8$ ,  $P =$   
285  $1.585 \times 10^{-5}$ ). In particular, *M. myaka* consumed about 2 times more detritus than *S. mariae* (Tukey  
286 HSD:  $P = 0.044$ ), and *S. linnellii* consumed about 1.5 times more detritus than *S. mariae* (Tukey  
287 HSD:  $P = 0.021$ ). Plant tissue consumption varied across species (Fig. 1E; ANOVA:  $\chi^2 = 49.347$ ,  
288  $df = 8$ ,  $P = 5.455 \times 10^{-8}$ ), with *K. eistentrauti* consuming at least 5 times more plant tissue than *S.*  
289 *linnellii*, *S. steinbachi*, *P. maclareni*, *S. mariae*, and *S. pindu* (Tukey HSD:  $P < 0.05$ ). Shrimp  
290 consumption also varied among species (Fig. 1A; ANOVA:  $\chi^2 = 116.674$ ,  $df = 8$ ,  $P < 2 \times 10^{-16}$ ),  
291 with *S. mongo* consuming at least 7 times more shrimp than all other species (Tukey HSD:  $P <$   
292  $0.001$ ). Consumption of unidentified diet items varied among species (ANOVA:  $\chi^2 = 55.175$ ,  $df =$   
293  $8$ ,  $P = 4.082 \times 10^{-9}$ ), with *S. steinbachi* consuming at least 2 times more than all other species (Tukey  
294 HSD:  $P < 0.05$ ). *P. maclareni* was the only species to consume *Corvospongilla* sponge (Fig. 1D;  
295 ANOVA:  $\chi^2 = 55.461$ ,  $df = 8$ ,  $P = 3.591 \times 10^{-9}$ ). *Corvospongilla* spicules made up 21.2% of *P.*  
296 *maclareni*'s diet (Table 1; Fig. 2). Similarly, *S. mariae* was the only species to consume ants (Fig.  
297 1B; ANOVA:  $\chi^2 = 51.806$ ,  $df = 8$ ,  $P = 1.835 \times 10^{-8}$ ). Ants made up 9.8% of *S. mariae*'s diet (Table  
298 1; Fig. 2). *S. pindu* was the only species to consume Trichopteran larvae (Fig. 1C; ANOVA:  $\chi^2 =$

299 58.100,  $df = 8$ ,  $P = 1.098 \times 10^{-9}$ ). Trichopteran larvae made up 14.1% of *S. pindu*'s diet (Table 1;  
300 Fig. 2).

301 Collapsing these proportional data to presence/absence data of individual dietary  
302 components (as described above) yielded similar results. Detritus (ANOVA:  $\chi^2 = 24.440$ ,  $df = 8$ ,  
303  $P = 0.002$ ), plant tissue (ANOVA:  $\chi^2 = 36.158$ ,  $df = 8$ ,  $P = 1.643 \times 10^{-5}$ ), shrimp (ANOVA:  $\chi^2 =$   
304  $19.1124$ ,  $df = 8$ ,  $P = 0.014$ ), unidentified items (ANOVA:  $\chi^2 = 45.748$ ,  $df = 8$ ,  $P = 2.654 \times 10^{-7}$ );  
305 *Corvospongilla* sponge (ANOVA:  $\chi^2 = 55.628$ ,  $df = 8$ ,  $P = 3.333 \times 10^{-9}$ ); ants (ANOVA:  $\chi^2 =$   
306  $51.997$ ,  $df = 8$ ,  $P = 1.685 \times 10^{-8}$ ); and Trichopteran larvae (ANOVA:  $\chi^2 = 17.6528$ ,  $df = 8$ ,  $P =$   
307  $0.024$ ), all varied significantly among species by presence/absence with similar specialists as  
308 described above.

309

#### 310 Carbon and nitrogen stable isotopes

311 We found  $\delta^{13}\text{C}$  values to be significantly different among species when comparing all 11 Barombi  
312 Mbo cichlids (ANOVA:  $\chi^2 = 123.36$ ,  $df = 11$ ,  $P = 2.2 \times 10^{-16}$ ). *S. lohbergeri* had the highest  $\delta^{13}\text{C}$   
313 value, indicative of predominantly littoral foraging, significantly more than all other species except  
314 *P. maclareni*, *S. caroli*, and *S. steinbachi* (Tukey HSD:  $P < 0.01$ ). Contrastingly, *M. myaka* had  
315 the lowest  $\delta^{13}\text{C}$  value, consistent with its open-water pelagic habitat, significantly lower than all  
316 other species except *K. dikume*, *K. eisentrauti*, *S. linnellii*, and *S. pindu* (Tukey HSD:  $P < 0.05$ ). *S.*  
317 *mongo* exhibited significantly higher  $\delta^{13}\text{C}$  than *S. pindu* when comparing all Barombi Mbo cichlids  
318 (Tukey HSD:  $P = 0.041$ ) and only *Stomatepia* species (Tukey HSD:  $P = 0.005$ ).

319  $\delta^{15}\text{N}$  values were also significantly different among species when comparing all Barombi  
320 Mbo species (ANOVA:  $\chi^2 = 67.967$ ,  $df = 11$ ,  $P = 2.969 \times 10^{-10}$ ). *K. dikume* had the highest  $\delta^{15}\text{N}$   
321 value of any species, significantly more than *M. myaka*, *S. caroli*, *S. lohbergeri*, and *S. pindu*

322 (Tukey HSD:  $P < 0.05$ ). *S. lohbergeri* had the lowest  $\delta^{15}\text{N}$  value, significantly lower than all other  
323 species except *M. myaka*, *S. caroli*, and *S. steinbachi* (Tukey HSD:  $P < 0.05$ ). There were no  
324 significant differences in  $\delta^{15}\text{N}$  values among *Stomatepia* species. Despite these significant  
325 differences in both  $\delta^{13}\text{C}$  and  $\delta^{15}\text{N}$  values between species, there was minimal clustering by species  
326 when visualizing stable isotope values (Fig. 4).

327

## 328 **DISCUSSION**

329 We found minimal evidence of overall trophic niche partitioning among Barombi Mbo cichlids.  
330 However, we found several dietary specializations on unique resources among all freshwater  
331 fishes. In particular, our data suggests that Lake Barombi Mbo harbors a sponge specialist, *P.*  
332 *maclareni*, and an ant specialist, *S. mariae*. We also document a nocturnal specialist on shrimp (*S.*  
333 *mongo*) and specialists on Trichopteran (caddisfly) larvae (*S. pindu*), and plants (*K. eisentrauti*).  
334 Herbivory is common among African cichlids (Ribbink & Lewis 1982; Genner & Turner 2005),  
335 and *K. eisentrauti* was previously qualitatively described as a plant specialist (Trewavas *et al.*  
336 1972). However, the remaining resource specializations are particularly rare among African  
337 cichlids. Nocturnality has only been documented once out of thousands of Malawi cichlids (Lloyd  
338 *et al.* 2021) and spongivory is only qualitatively reported from *Coptodon spongotroktis* in Lake  
339 Bermin, Cameroon (Stiassny *et al.* 1992). In general, our findings align with the major trophic  
340 strategies and specialists outlined by Trewavas *et al.* (1972), providing quantitative data on the  
341 differences in dietary component proportions between species.

342

343 Minimal trophic niche partitioning in Barombi Mbo cichlids

344 Our measurements of niche overlap suggest there is not strong evidence for dietary niche  
345 partitioning in Barombi Mbo cichlids, with Pianka index values of 84% similarity and higher for  
346 most species. Furthermore, while we did find significant differences in  $\delta^{13}\text{C}$  and  $\delta^{15}\text{N}$  values  
347 between species, there was little evidence of clustering by species. This is not uncommon, as  
348 coexistence among ecologically similar species can occur even without fine-scale niche  
349 partitioning, particularly within speciose African cichlid communities in the great lakes (Liem  
350 1980; Ribbink & Lewis 1981; Martin and Genner 2009).

351         Alternatively, dietary niche partitioning may have been obscured by variability in prey  
352 condition. Stomach content analyses are highly dependent on prey condition (Baker *et al.* 2014;  
353 Buckland *et al.* 2017). Soft-bodied organisms are likely to digest more quickly than those with  
354 chitinous exoskeletons or other similarly tough external features, potentially leading to an  
355 overrepresentation of hard-bodied, less digestible organisms (Randall 1967). Furthermore, there  
356 may be finer-scale niche partitioning at lower taxonomic prey levels (i.e. genus, species) than what  
357 can be detected by microscopic visual analysis of stomach contents. DNA metabarcoding  
358 approaches may aid in identifying these finer-scale patterns (Berry *et al.* 2015; Harms-Tuohy *et*  
359 *al.* 2016; Jakubavičiūtė *et al.* 2017) and can also account for highly digested prey (Carreon-  
360 Martinez *et al.* 2011), though such techniques come with their own suite of challenges and may  
361 overestimate the relative importance of certain dietary items (Sakaguchi *et al.* 2017).

362         Another explanation for the minimal trophic niche partitioning we observed could lie in  
363 undetected seasonal differences. Our data combined specimens collected during both the wet (July-  
364 September) and dry (December-January) seasons in Cameroon across multiple years (2009-10,  
365 2016). Prey availability often differs greatly between seasons, especially in tropical systems  
366 (Winemiller 1990; Correa & Winemiller 2014). However, dietary profiles of the trophic specialists



367 in Barombi Mbo were generally consistent between seasons and years collected. We conclude that  
368 these cichlids may be another example of Liem's paradox, in which trophic specialists act as  
369 opportunistic feeders until resources become scarce enough that they use their specialized trophic  
370 morphology to feed on unusual resources. All specialists appear to be predominantly feeding on  
371 common, shared resources in Barombi Mbo (microinvertebrates, microalgae, detritus) while also  
372 supplementing their diet with unique resources during both the wet and dry seasons.

373

#### 374 Spongivory in *P. maclareni*

375 One of our most exciting findings is evidence of sponge specialization in *P. maclareni*. A  
376 significant proportion (20%) of this species' diet is freshwater sponges (*Corvospongilla spp.*) and  
377 it is the only Barombi Mbo species to consume this diet item. Dietary specialization on sponges is  
378 extremely rare among fishes, with only about 0.04% of all fishes (FishBase) consuming sponges  
379 (2 out of a total of 13 entries are Cameroon crater lake cichlids). The most notable examples of  
380 this feeding strategy are marine spongivores that reside on Caribbean coral reefs (Randall &  
381 Hartman 1968; Wulff 1994). Eleven Caribbean reef fishes have been identified as sponge  
382 specialists, including angelfish in the genera *Holocanthus* and *Pomacanthus*, trunkfish in genus  
383 *Acanthostracion*, and filefish in genus *Cantherhines* (Randall & Hartman 1968). Sponge-eating is  
384 even more rare within freshwater systems, with the only two examples found in Cameroon crater  
385 lake cichlids of Lakes Barombi Mbo (Trewavas *et al.* 1972) and Bermin (Stiassny *et al.* 1992;  
386 Schliewen 2005). Compared to the proportions of sponge found in the stomachs of Caribbean reef  
387 fish—*Holocanthus spp.* (>96%), *Pomacanthus spp.* (70-75%), *Cantherhines macrocerus* (86.5%)  
388 (Randall & Hartman 1968)—the proportion of sponge in *P. maclareni*'s stomach is small (20%),  
389 but still notable considering it is the only fish in this system to consume freshwater sponges.

390 Furthermore, this proportion is still comparable to some of the other Caribbean spongivores,  
391 including *Acanthostracion spp.* (11-30%) and *Cantherhines pullus* (30.9%) (Randall & Hartman  
392 1968).

393 Sponges are a rare diet item among fish and other vertebrates because they are incredibly  
394 hard to consume. Most species in the Phylum Porifera have tough exteriors and skeletons made of  
395 spongin, calcium carbonate, and silica—all rigid materials. Spongivorous vertebrates, including  
396 the hawksbill turtle (*Eretmochelys imbricata*) (Meylan 1988; Witzel 1983; Eckert *et al* 1999) and  
397 several Caribbean reef fishes have developed morphological adaptations in the feeding apparatus  
398 to aid in biting sponge spicules (Hourigan *et al.* 1989). In particular, *E. imbricata* possesses a  
399 narrow, beak-shaped mouth that allows for foraging on sponges in coral reefs (Witzel 1983; Eckert  
400 *et al.* 1999) and by scraping against the reef's surface (Blumenthal *et al.* 2009). Several species of  
401 Caribbean angelfish (*Holocanthus tricolor*, *Pomacanthus paru*, *Pomacanthus arcuatus*) also  
402 possess a beak-like mouth and multiple rows of tricuspid teeth used to shear sponge off its substrate  
403 (Hourigan *et al.* 1989). *P. maclareni* also appears to have adaptations that may aid in sponge-  
404 eating, including short robust oral jaws, large epaxial musculature (particularly when compared to  
405 other Barombi Mbo cichlids), and fleshy lips with protruding tricuspid teeth.

406 Spongivory in fishes may have evolved through modification of an algae-eating trophic  
407 strategy. Algivores often possess morphological and locomotory adaptations to aid in the biting,  
408 shearing, and scraping of algae attached to rocks and other substrates (Hulsey *et al.* 2019;  
409 Perevolotsky *et al.* 2020). This specialized feeding apparatus may have been co-opted and  
410 modified for a sponge spicule diet, as the functional and locomotory processes of shearing algae  
411 and sponge are likely similar. In fact, Caribbean spongivores use their peripheral teeth in a similar  
412 manner to tear both algae and sponge (Hourigan *et al.* 1989).

413 Another hurdle to spongivory lies in the difficulty of sponge digestion. Poriferans are  
414 typically made of materials (spongin, collagen, calcium carbonate, silica) that are difficult to digest  
415 and not nutritionally valuable to vertebrates. Furthermore, many sponges produce noxious  
416 secondary metabolites, including alkaloids, terpenoids, brominated compounds, and various acids  
417 (Faulkner 1984). Several marine sponges producing these compounds have been proven toxic to  
418 fish in lab experiments (Green 1977). To aid in these challenges, spongivorous fish may have  
419 morphological and physiological adaptations that allow for sponge digestion. Specifically,  
420 adaptations in the gut microbiome may be an essential component to sponge digestion. The gut  
421 microbiomes of other vertebrates have allowed for consumption and dietary specialization on rare  
422 food items, including vampire finches in the Galapagos (Michel *et al.* 2018; Song *et al.* 2019) and  
423 scale-eating pupfish (Heras & Martin 2021). Though the gut microbiome of wild-caught *P.*  
424 *maclareni* has been previously sequenced in a large comparative study (Baldo *et al.* 2017; Baldo  
425 *et al.* 2019), its functional relevance to spongivory was not assessed. Future research on *P.*  
426 *maclareni* and other spongivorous fishes should investigate the core gut microbiome of these  
427 species and any potential benefits the microbial community confers for sponge-eating.

428

#### 429 Ant consumption by *S. mariae*

430 Another notable finding of this study was evidence of ant specialization in *S. mariae*. We found  
431 that about 10% of this species' diet is ants, and it is the only Barombi Mbo cichlid to consume this  
432 item. While *S. mariae* has previously been noted to feed on adult terrestrial insects (Trewavas *et*  
433 *al.* 1972), this is the first study documenting terrestrial ants as a major component of this species'  
434 diet. There are several examples of freshwater fish in tropical systems in which ants have been  
435 observed as the majority dietary component, including flagtail *Kuhlia marginate* from Moorea,

436 French Polynesia (Resh *et al.* 1999), and queen danio *Devario regina* from Malaysia (Zakeyuddin  
437 *et al.* 2017). Most relevant to this study are several species of Ecuadorian cichlids collected in the  
438 Upper Amazon River Basin (Saul 1975). All seven species collected (*Aequidens spp.*, *Crenicichla*  
439 *spp.*, *Petenia myseri*) consumed ants, with this food item being the most abundant dietary  
440 component in *C. lucius* and *C. macrophthalmia* (Saul 1975). Ants were listed as an “occasional”  
441 food source for cichlids in this study (Saul 1975), a qualitative description that matches with our  
442 quantitative finding of ants making up 10% of *S. mariae*’s diet.

443       Terrestrial insects are not uncommon components of fish diets, as they enter lakes and  
444 rivers through fallen vegetation. The amount of terrestrial insects introduced into aquatic  
445 environments likely depends on vegetative and riparian cover, with insect abundance likely  
446 increasing as canopy cover increases (Bojsen 2005; Zakeyuddin *et al.* 2017). Fish skimming the  
447 water’s surface for food will take up these insects while foraging. This is likely why terrestrial  
448 insects are an important food source of known surface foragers (Resh *et al.* 1999; Nakano *et al.*  
449 1999). While there have not been many studies on the subject, Sullivan *et al.* (2014) reported that  
450 the nutritional quality of terrestrial and aquatic arthropods is similar, particularly with respect to  
451 structural chitin—a limiting factor in nutrition as this polymer is prevalent in all arthropods and  
452 not easily digested by fish. Various species of terrestrial Cameroonian ants have been found to  
453 have high levels of protein (55-75% crude protein), and are rich in iron, zinc, potassium,  
454 phosphorus, and various other nutritionally-important minerals (Deblauwe & Janssens 2008). In  
455 fact, terrestrial insects, including ants, can subsidize the nutrient pool of small lakes, particularly  
456 those which have low primary productivity and are located in heavily forested areas (Mehner *et*  
457 *al.* 2005). Overabundance of terrestrial food sources in the diet of aquatic animals can indicate that

458 the lake or stream is lacking in autochthonous nutrients (Saul 1975), as is the case for oligotrophic  
459 Barombi Mbo (Kling 1988).

460 It is interesting that *S. mariae* was the only Barombi Mbo cichlid to consume ants, as *S.*  
461 *mariae* and *S. pindu* are ecologically similar, hybridize in the lab, and represent the extreme tails  
462 of a unimodal distribution for all trophic traits measured (Martin 2012). The answer may lie in  
463 potential sensory adaptations that *S. mariae* uses to detect ants and its shoaling mid-water habitat,  
464 whereas *S. pindu* is a solitary benthic species that forages within the leaf-litter (Trewavas *et al.*  
465 1972). Indeed, the genus *Stomatepia* was named for its highly enlarged canal neuromasts (stomae).  
466 Sensory traits of Barombi Mbo cichlids remain understudied, except for recent work showing  
467 differences in the visual sensory system and the pattern of photoreceptors among various species,  
468 with evidence of differences in opsin gene expression between shallow and deep-water species  
469 (Musilova *et al.* 2019). Future studies should investigate additional sensory systems in *S. mariae*  
470 and other Barombi Mbo specialists to better understand prey targeting of rare food sources.

471

## 472 **ACKNOWLEDGMENTS**

473 This study was funded by a National Geographic Society Young Explorer's Grant, a Lewis and  
474 Clark Field Research grant from the American Philosophical Society, the University of North  
475 Carolina at Chapel Hill, and the University of California, Berkeley to CHM. We gratefully  
476 acknowledge the Cameroonian government and the local chiefs of Barombi Mbo village and  
477 surrounding communities for permission to conduct this research. We also thank Jackson Waite-  
478 Himmelwright and Patrick Enyang for field assistance.

479

480

481 **REFERENCES**

482 Albertson, R. C. Morphological Divergence Predicts Habitat Partitioning in a Lake Malawi

483 Cichlid Species Complex. *Copeia* **2008**: 689–698 (2008).

484 Andersen, T. & Holzenthal, R. W. West African Triaenodes McLachlan (Trichoptera:

485 Leptoceridae). 2. Subgenus Triaenodes sensu stricto. *Tijdschrift voor Entomologie* **145**: 61–88

486 (2002).

487 Baker, R., Buckland, A. & Sheaves, M. Fish gut content analysis: robust measures of diet

488 composition. *Fish and Fisheries* **15**: 170–177 (2014).

489 Baldo, L. *et al.* Convergence of gut microbiotas in the adaptive radiations of African cichlid

490 fishes. *The ISME Journal* **11**: 1975–1987 (2017).

491 Baldo, L., Riera, J. L., Salzburger, W. & Barluenga, M. Phylogeography and Ecological Niche

492 Shape the Cichlid Fish Gut Microbiota in Central American and African Lakes. *Frontiers in*

493 *Microbiology* **10**: 2372 (2019).

494 Berry, O. *et al.* Comparison of morphological and DNA metabarcoding analyses of diets in

495 exploited marine fishes. *Marine Ecology Progress Series* **540**: 167–181 (2015).

496 Blount, Z. D., Borland, C. Z. & Lenski, R. E. Historical contingency and the evolution of a key

497 innovation in an experimental population of *Escherichia coli*. *PNAS* **105**: 7899–7906 (2008).

498 Blumenthal, J. M. *et al.* Ecology of Hawksbill Turtles, *Eretmochelys imbricata*, on a Western

499 Caribbean Foraging Ground. *Chelonian Conservation and Biology* **8**: 1–10 (2009).

500 Bojsen, B. H. Diet and condition of three fish species (Characidae) of the Andean foothills in

501 relation to deforestation. *Environmental Biology of Fishes* **73**: 61–73 (2005).

- 502 Bolnick, D. I. & Fitzpatrick, B. M. Sympatric Speciation: Models and Empirical Evidence.  
503 *Annual Review of Ecology, Evolution, and Systematics* **38**: 459–487 (2007).
- 504 Bolnick, D. I. Sympatric Speciation in Threespine Stickleback: Why Not? *International Journal*  
505 *of Ecology* **2011**: e942847 (2011).
- 506 Buckland, A., Baker, R., Loneragan, N. & Sheaves, M. Standardising fish stomach content  
507 analysis: The importance of prey condition. *Fisheries Research* **196**: 126–140 (2017).
- 508 Carreon-Martinez, L., Johnson, T. B., Ludsin, S. A. & Heath, D. D. Utilization of stomach  
509 content DNA to determine diet diversity in piscivorous fishes. *Journal of Fish Biology* **78**: 1170–  
510 1182 (2011).
- 511 Conith, A. J., Kidd, M. R., Kocher, T. D. & Albertson, R. C. Ecomorphological divergence and  
512 habitat lability in the context of robust patterns of modularity in the cichlid feeding apparatus.  
513 *BMC Evolutionary Biology* **20**: 95 (2020).
- 514 Cornen, G., Bande, Y., Giresse, P. & Maley, J. The nature and chronostratigraphy of Quaternary  
515 pyroclastic accumulations from lake Barombi Mbo (West-Cameroon). *Journal of Volcanology*  
516 *and Geothermal Research* **51**: 357–374 (1992).
- 517 Correa, S. B. & Winemiller, K. O. Niche partitioning among frugivorous fishes in response to  
518 fluctuating resources in the Amazonian floodplain forest. *Ecology* **95**: 210–224 (2014)..
- 519 Coyne, J. A., Coyne, H. A. & Orr, H. A. *Speciation*. (Oxford University Press, Incorporated,  
520 2004).
- 521 De Cáceres, M. D. & Legendre, P. Associations between species and groups of sites: indices and  
522 statistical inference. *Ecology* **90**: 3566–3574 (2009).

- 523 Deblauwe, I. & Janssens, G. P. J. New insights in insect prey choice by chimpanzees and gorillas  
524 in Southeast Cameroon: The role of nutritional value. *American Journal of Physical*  
525 *Anthropology* **135**: 42–55 (2008).
- 526 Dieckmann, U. & Doebeli, M. On the origin of species by sympatric speciation. *Nature* **400**:  
527 354–357 (1999).
- 528 Dufrière, M. & Legendre, P. Species Assemblages and Indicator Species: the Need for a Flexible  
529 Asymmetrical Approach. *Ecological Monographs* **67**: 345–366 (1997).
- 530 Eckert, K. L., Bjorndal, K. A., Abreu-Grobois, F. A., & Donnelly, M. Taxonomy, external  
531 morphology, and species identification. *Research and management techniques for the*  
532 *conservation of sea turtles* **21**: 11-13 (1999).
- 533 Faulkner, D. J. Marine natural products: metabolites of marine invertebrates. *Natural Product*  
534 *Reports* **1**: 551–598 (1984).
- 535 Ford, A. G. P. *et al.* Niche divergence facilitated by fine-scale ecological partitioning in a recent  
536 cichlid fish adaptive radiation. *Evolution* **70**: 2718–2735 (2016).
- 537 Gavrilets, S. & Losos, J. B. Adaptive Radiation: Contrasting Theory with Data. *Science* **323**:  
538 732–737 (2009).
- 539 Gavrilets, S. *Fitness Landscapes and the Origin of Species (MPB-41)*. (Princeton University  
540 Press, 2004).
- 541 Gelwick, F. P. & McIntyre, P. B. Chapter 22 - Trophic Relations of Stream Fishes. in *Methods in*  
542 *Stream Ecology, Volume 1 (Third Edition)* (eds. Hauer, F. R. & Lamberti, G. A.) 457–479  
543 (Academic Press, 2017). doi:[10.1016/B978-0-12-416558-8.00022-6](https://doi.org/10.1016/B978-0-12-416558-8.00022-6).



- 544 Genner, M. J. & Turner, G. F. The mbuna cichlids of Lake Malawi: a model for rapid speciation  
545 and adaptive radiation. *Fish and Fisheries* **6**: 1–34 (2005).
- 546 Genner, M. J., Hawkins, S. J. & Turner, G. F. Foraging of rocky habitat cichlid fishes in Lake  
547 Malawi: coexistence through niche partitioning? *Oecologia* **121**: 283–292 (1999).
- 548 Genner, M. J., Turner, G. F., Barker, S. & Hawkins, S. J. Niche segregation among Lake Malawi  
549 cichlid fishes? Evidence from stable isotope signatures. *Ecology Letters* **2**: 185–190 (1999).
- 550 Gillespie, R. G. *et al.* Comparing Adaptive Radiations Across Space, Time, and Taxa. *Journal of*  
551 *Heredity* **111**: 1–20 (2020).
- 552 Grant, P. R. & Grant, B. R. Unpredictable Evolution in a 30-Year Study of Darwin’s Finches.  
553 *Science* **296**: 707–711 (2002).
- 554 Green, G. Ecology of toxicity in marine sponges. *Marine Biology* **40**: 207–215 (1977).
- 555 Harms-Tuohy, C. A., Schizas, N. V. & Appeldoorn, R. S. Use of DNA metabarcoding for  
556 stomach content analysis in the invasive lionfish *Pterois volitans* in Puerto Rico. *Marine Ecology*  
557 *Progress Series* **558**: 181–191 (2016).
- 558 Heras, J. & Martin, C. H. 2021. Nonadaptive radiation of the gut microbiome in an adaptive  
559 radiation of *Cyprinodon* pupfishes with minor shifts for scale-eating. *bioRxiv* 2021.01.06.425529  
560 (2021) doi:[10.1101/2021.01.06.425529](https://doi.org/10.1101/2021.01.06.425529).
- 561 Hertz, E., Trudel, M., Tucker, S., Beacham, T. D. & Mazumder, A. Overwinter shifts in the  
562 feeding ecology of juvenile Chinook salmon. *ICES Journal of Marine Science* **74**: 226–233  
563 (2017).

564 Hourigan, T. F., Stanton, F. G., Motta, P. J., Kelley', C. D. & Carlson', B. The feeding ecology  
565 of three species of Caribbean angelfishes (family Pomacanthidae). **24**: 105-116 (1989).

566 Hulsey, C. D., Alfaro, M. E., Zheng, J., Meyer, A. & Holzman, R. Pleiotropic jaw morphology  
567 links the evolution of mechanical modularity and functional feeding convergence in Lake  
568 Malawi cichlids. *Proceedings of the Royal Society B: Biological Sciences* **286**: 20182358 (2019).

569 Hyslop, E. J. Stomach contents analysis—a review of methods and their application. *Journal of*  
570 *Fish Biology* **17**: 411–429 (1980).

571 Jakubavičiūtė, E., Bergström, U., Eklöf, J. S., Haenel, Q. & Bourlat, S. J. DNA metabarcoding  
572 reveals diverse diet of the three-spined stickleback in a coastal ecosystem. *PLOS ONE* **12**:  
573 e0186929 (2017).

574 Jari Oksanen, F. Guillaume Blanchet, Michael Friendly, Roeland Kindt, Pierre Legendre, Dan  
575 McGlinn, Peter R. Minchin, R. B. O'Hara, Gavin L. Simpson, Peter Solymos, M. Henry H.  
576 Stevens, Eduard Szoecs and Helene Wagner (2019). vegan: Community Ecology Package. R  
577 package version 2.5-6. <https://CRAN.R-project.org/package=vegan>

578 Jinlong Zhang (2016). spaa: SPecies Association Analysis. R package version 0.2.2.  
579 <https://CRAN.R-project.org/package=spaa>

580 John Fox and Sanford Weisberg (2019). An {R} Companion to Applied Regression, Third  
581 Edition. Thousand Oaks CA: Sage. URL:  
582 <https://socialsciences.mcmaster.ca/jfox/Books/Companion/>

583 Kingsolver, J. G. *et al.* The Strength of Phenotypic Selection in Natural Populations. *The*  
584 *American Naturalist* **157**: 245–261 (2001).

- 585 Kling, G. W. Comparative transparency, depth of mixing, and stability of stratification in lakes  
586 of Cameroon, West Africa1. *Limnology and Oceanography* **33**: 27–40 (1988).
- 587 Kocher, T. D. Adaptive evolution and explosive speciation: the cichlid fish model. *Nat Rev*  
588 *Genet* **5**: 288–298 (2004).
- 589 Lamichhaney, S. *et al.* Evolution of Darwin’s finches and their beaks revealed by genome  
590 sequencing. *Nature* **518**: 371–375 (2015).
- 591 Lee, F., Simon, K. S. & Perry, G. L. W. Prey selectivity and ontogenetic diet shift of the globally  
592 invasive western mosquitofish (*Gambusia affinis*) in agriculturally impacted streams. *Ecology of*  
593 *Freshwater Fish* **27**: 822–833 (2018).
- 594 Levins, R. *Evolution in Changing Environments: Some Theoretical Explorations*. (Princeton  
595 University Press, 1968).
- 596 Liem, K. F. Adaptive Significance of Intra- and Interspecific Differences in the Feeding  
597 Repertoires of Cichlid Fishes. *American Zoologist* **20**: 295–314 (1980).
- 598 Lloyd, E., Chhouk, B., Conith, A. J., Keene, A. C. & Albertson, R. C. Diversity in rest–activity  
599 patterns among Lake Malawi cichlid fishes suggests a novel axis of habitat partitioning. *Journal*  
600 *of Experimental Biology* **224**: (2021).
- 601 Losos, J. B. Phylogenetic niche conservatism, phylogenetic signal and the relationship between  
602 phylogenetic relatedness and ecological similarity among species. *Ecology Letters* **11**: 995–1003  
603 (2008).
- 604 Manko, P. Stomach content analysis in freshwater fish feeding ecology. 117 (2016).

605 Martin, C. H. & Genner, M. J. High niche overlap between two successfully coexisting pairs of  
606 Lake Malawi cichlid fishes. *Canadian Journal of Fisheries and Aquatic Sciences* **66**: 579–588  
607 (2009).

608 Martin, C. H. & Richards, E. J. The Paradox Behind the Pattern of Rapid Adaptive Radiation:  
609 How Can the Speciation Process Sustain Itself Through an Early Burst? *Annual Review of*  
610 *Ecology, Evolution, and Systematics* **50**: 569–593 (2019).

611 Martin, C. H. *et al.* Complex histories of repeated gene flow in Cameroon crater lake cichlids  
612 cast doubt on one of the clearest examples of sympatric speciation. *Evolution* **69**: 1406–1422  
613 (2015).

614 Martin, C. H. Strong Assortative Mating by Diet, Color, Size, and Morphology but Limited  
615 Progress Toward Sympatric Speciation in a Classic Example: Cameroon Crater Lake Cichlids.  
616 *Evolution* **67**: 2114–2123 (2013).

617 Martin, C. H. Strong assortative mating by diet, color, size, and morphology but limited progress  
618 toward sympatric speciation in a classic example: Cameroon crater lake cichlids. *Evolution* **67**:  
619 2114–2123 (2013).

620 Martin, C. H. Weak Disruptive Selection and Incomplete Phenotypic Divergence in Two Classic  
621 Examples of Sympatric Speciation: Cameroon Crater Lake Cichlids. *The American Naturalist*  
622 **180**: E90–E109 (2012).

623 McNyset, K. M. Ecological niche conservatism in North American freshwater fishes. *Biological*  
624 *Journal of the Linnean Society* **96**: 282–295 (2009).

- 625 Mehner, T., Ihlau, J., Dörner, H. & Hölker, F. Can feeding of fish on terrestrial insects subsidize  
626 the nutrient pool of lakes? *Limnology and Oceanography* **50**: 2022–2031 (2005).
- 627 Meylan, A. Spongivory in Hawksbill Turtles: A Diet of Glass. *Science* **239**: 393–395 (1988).
- 628 Michel, A. J. *et al.* The gut of the finch: uniqueness of the gut microbiome of the Galápagos  
629 vampire finch. *Microbiome* **6**: 167 (2018).
- 630 Mohd Shafiq Zakeyuddin, Mansor Mat Isa, Che Salmah Md Rawi, Amir Shah Ruddin Md Sah &  
631 Abu Hassan Ahmad. Terrestrial insects as the main food for freshwater fish in Sungai Kerian  
632 tributaries: an implication on habitat conservation. *Sains Malaysiana* **46**: 833–843 (2017).
- 633 Musilova, Z. *et al.* Evolution of the visual sensory system in cichlid fishes from crater lake  
634 Barombi Mbo in Cameroon. *Molecular Ecology* **28**: 5010–5031 (2019).
- 635 Nakano, S. *et al.* Selective foraging on terrestrial invertebrates by rainbow trout in a forested  
636 headwater stream in northern Japan: Terrestrial invertebrate feeding by fish. *Ecological Research*  
637 **14**: 351–360 (1999).
- 638 Otto, S. P., Servedio, M. R. & Nuismer, S. L. Frequency-Dependent Selection and the Evolution  
639 of Assortative Mating. *Genetics* **179**: 2091–2112 (2008).
- 640 Perevolotsky, T., Martin, C. H., Rivlin, A. & Holzman, R. Work that body: fin and body  
641 movements determine herbivore feeding performance within the natural reef environment.  
642 *Proceedings of the Royal Society B: Biological Sciences* **287**: 20201903 (2020).
- 643 Pianka, E. R. The Structure of Lizard Communities. *Annual Review of Ecology and Systematics*  
644 **4**: 53–74 (1973).

- 645 Poelstra, J. W., Richards, E. J. & Martin, C. H. Speciation in sympatry with ongoing secondary  
646 gene flow and a potential olfactory trigger in a radiation of Cameroon cichlids. *Molecular*  
647 *Ecology* **27**: 4270–4288 (2018).
- 648 Post, D. M. Using Stable Isotopes to Estimate Trophic Position: Models, Methods, and  
649 Assumptions. *Ecology* **83**: 703–718 (2002).
- 650 Pritchard, P. C. H. and J. A. Mortimer. 1999. Taxonomy, External Morphology, and Species  
651 Identification, p.21- 38. In: Karen L. Eckert, Karen A. Bjorndal, F. Alberto Abreu G. and  
652 Marydele Donnelly (eds.), Research and Management Techniques for the Conservation of Sea  
653 Turtles. IUCN/SSC Marine Turtle Specialist Group Publ. No. 4. Washington, D.C.
- 654 R Core Team (2020). R: A language and environment for statistical computing. R Foundation for  
655 Statistical Computing, Vienna, Austria. URL <https://www.R-project.org/>.
- 656 Randall, J. E. & Hartman, W. D. Sponge-feeding fishes of the West Indies. *Marine Biology* **1**:  
657 216–225 (1968).
- 658 Randall, J. E. Food Habits of Reef Fishes of the West Indies. **5**: 94 (1967).
- 659 Resh, V. H., Moser, M. & Poole, M. Feeding habits of some freshwater fishes in streams of  
660 Moorea, French Polynesia. *Annales de Limnologie - International Journal of Limnology* **35**:  
661 205–210 (1999).
- 662 Ribbink, A. et al. A preliminary survey of the cichlid fishes of rocky habitats in Lake Malawi:  
663 results-The Mbuna-Pseudotropheus. *African Zoology* (1983).
- 664 Richards, E. J., Poelstra, J. W. & Martin, C. H. Don't throw out the sympatric speciation with the  
665 crater lake water: fine-scale investigation of introgression provides equivocal support for causal

- 666 role of secondary gene flow in one of the clearest examples of sympatric speciation. *Evolution*  
667 *Letters* **2**: 524–540 (2018).
- 668 Richards, E. J., Servedio, M. R. & Martin, C. H. Searching for Sympatric Speciation in the  
669 Genomic Era. *BioEssays* **41**: 1900047 (2019).
- 670 Ross, S. T. Resource Partitioning in Fish Assemblages: A Review of Field Studies. *Copeia* **1986**:  
671 352–388 (1986).
- 672 Sakaguchi, S. O. *et al.* Comparison of morphological and DNA-based techniques for stomach  
673 content analyses in juvenile chum salmon *Oncorhynchus keta*: a case study on diet richness of  
674 juvenile fishes. *Fisheries Science* **83**: 47–56 (2017).
- 675 Saul, W. G. An Ecological Study of Fishes at a Site in Upper Amazonian Ecuador. *Proceedings*  
676 *of the Academy of Natural Sciences of Philadelphia* **127**: 93–134 (1975).
- 677 Schliewen, U. K. & Klee, B. Reticulate sympatric speciation in Cameroonian crater lake cichlids.  
678 *Frontiers in Zoology* **1**: 5 (2004).
- 679 Schliewen, U. K. Cichlid species flocks in small Cameroonian lakes. *Freshwater ecoregions of*  
680 *Africa and Madagascar: a conservation assessment* 58-60 (2005).
- 681 Schliewen, U. K., Tautz, D. & Pääbo, S. Sympatric speciation suggested by monophyly of crater  
682 lake cichlids. *Nature* **368**: 629–632 (1994).
- 683 Schluter, D. *The Ecology of Adaptive Radiation*. (OUP Oxford, 2000).
- 684 Seegers, L., and H. Tichy. The *Oreochromis alcalicus* flock (Teleostei: Cichlidae) from Lake  
685 Natron and Magadi, Tanzania and Kenya, with description of two new species. *Ichthyological*  
686 *Exploration of Freshwaters* **10**:97–146 (1999).

- 687 Seehausen, O. Explosive speciation rates and unusual species richness in haplochromine cichlid  
688 fishes: Effects of sexual selection. in *Advances in Ecological Research* vol. 31 237–274  
689 (Academic Press, 2000).
- 690 Song, S. J. *et al.* Is there convergence of gut microbes in blood-feeding vertebrates?  
691 *Philosophical Transactions of the Royal Society B: Biological Sciences* **374**: 20180249 (2019).
- 692 Stiassny, M. L. J., Schliewen, U. K., & Dominey, W. J. A new species flock of cichlid fishes  
693 from Lake Bermin, Cameroon with a description of eight new species of Tilapia (Labroidei:  
694 Cichlidae). *Ichthyological Exploration of Freshwaters* **3**(4): 311-346 (1992).
- 695 Stroud, J. T. & Losos, J. B. Bridging the Process-Pattern Divide to Understand the Origins and  
696 Early Stages of Adaptive Radiation: A Review of Approaches With Insights From Studies of  
697 Anolis Lizards. *Journal of Heredity* **111**: 33–42 (2020).
- 698 Sullivan, M. L., Zhang, Y. & Bonner, T. H. Carbon and nitrogen ratios of aquatic and terrestrial  
699 prey for freshwater fishes. *Journal of Freshwater Ecology* **29**: 259–266 (2014).
- 700 Thalmann, H. L., Daly, E. A. & Brodeur, R. D. Two Anomalously Warm Years in the Northern  
701 California Current: Impacts on Early Marine Steelhead Diet Composition, Morphology, and  
702 Potential Survival. *Transactions of the American Fisheries Society* **149**: 369–382 (2020).
- 703 Trewavas, E., Green, J. & Corbet, S. A. Ecological studies on crater lakes in West Cameroon  
704 Fishes of Barombi Mbo. *Journal of Zoology* **167**: 41–95 (1972).
- 705 Turelli, M., N. H. Barton, and J. A. Coyne. Theory and speciation. *Trends in Ecology and*  
706 *Evolution* **16**:330–343 (2001).



707 Varghese, S. P., Somvanshi, V. S. & Dalvi, R. S. Diet composition, feeding niche partitioning  
708 and trophic organisation of large pelagic predatory fishes in the eastern Arabian Sea.  
709 *Hydrobiologia* **736**: 99–114 (2014).

710 Wagner, C. E., McIntyre, P. B., Buels, K. S., Gilbert, D. M. & Michel, E. Diet predicts intestine  
711 length in Lake Tanganyika’s cichlid fishes. *Functional Ecology* **23**: 1122–1131 (2009).

712 Winemiller, K. O. & Pianka, E. R. Organization in Natural Assemblages of Desert Lizards and  
713 Tropical Fishes. *Ecological Monographs* **60**: 27–55 (1990).

714 Winemiller, K. O. Spatial and Temporal Variation in Tropical Fish Trophic Networks.  
715 *Ecological Monographs* **60**: 331–367 (1990).

716 Witzell, W. N. *Synopsis of Biological Data on the Hawksbill Turtle, Eretmochelys Imbricata*  
717 (*Linnaeus, 1766*). (Food & Agriculture Org., 1983).

718 Wulff, J. L. Sponge feeding by Caribbean angelfishes, trunkfishes, and filefishes. *Sponges in*  
719 *Time and Space*. 265-271 (1994).

720

721

722

723

724

725

726

727

728

729 **TABLES AND FIGURES**

730 **Table 1:** Mean proportion of each dietary component and sample sizes by species. BA is Levins'  
731 standardized index of niche breadth (Levins 1968).

| Dietary component            | <i>Konia dikume</i> | <i>Konia eisentrauti</i> | <i>Myaka myaka</i> | <i>Sarotherodon linnellii</i> | <i>Sarotherodon steinbachi</i> | <i>Pungu maclareni</i> | <i>Stomatepia mongo</i> | <i>Stomatepia mariae</i> | <i>Stomatepia pindu</i> |
|------------------------------|---------------------|--------------------------|--------------------|-------------------------------|--------------------------------|------------------------|-------------------------|--------------------------|-------------------------|
| Ant                          | 0.000               | 0.000                    | 0.000              | 0.000                         | 0.000                          | 0.000                  | 0.000                   | 0.098                    | 0.000                   |
| <i>Corvospongilla</i> Sponge | 0.000               | 0.000                    | 0.000              | 0.000                         | 0.000                          | 0.212                  | 0.000                   | 0.000                    | 0.000                   |
| Detritus                     | 0.889               | 0.628                    | 1.000              | 0.865                         | 0.608                          | 0.609                  | 0.143                   | 0.526                    | 0.651                   |
| Dipteran Larvae              | 0.111               | 0.027                    | 0.000              | 0.000                         | 0.000                          | 0.003                  | 0.000                   | 0.023                    | 0.000                   |
| Ephemeropteran Larvae        | 0.000               | 0.101                    | 0.000              | 0.025                         | 0.009                          | 0.088                  | 0.000                   | 0.120                    | 0.000                   |
| Fish                         | 0.000               | 0.000                    | 0.000              | 0.060                         | 0.000                          | 0.000                  | 0.000                   | 0.074                    | 0.000                   |
| Gastropod Shell              | 0.000               | 0.000                    | 0.000              | 0.000                         | 0.000                          | 0.003                  | 0.000                   | 0.000                    | 0.000                   |
| Nematode                     | 0.000               | 0.000                    | 0.000              | 0.000                         | 0.000                          | 0.000                  | 0.000                   | 0.015                    | 0.000                   |
| Plant Tissue                 | 0.000               | 0.228                    | 0.000              | 0.045                         | 0.000                          | 0.016                  | 0.019                   | 0.006                    | 0.000                   |
| Shrimp                       | 0.000               | 0.000                    | 0.000              | 0.000                         | 0.000                          | 0.008                  | 0.629                   | 0.001                    | 0.091                   |
| Silt                         | 0.000               | 0.012                    | 0.000              | 0.000                         | 0.000                          | 0.002                  | 0.000                   | 0.000                    | 0.000                   |
| Trichopteran Larvae          | 0.000               | 0.000                    | 0.000              | 0.000                         | 0.000                          | 0.000                  | 0.000                   | 0.000                    | 0.141                   |
| Unidentified                 | 0.000               | 0.005                    | 0.000              | 0.006                         | 0.383                          | 0.059                  | 0.209                   | 0.137                    | 0.117                   |
| n                            | 3                   | 37                       | 6                  | 17                            | 15                             | 63                     | 7                       | 44                       | 11                      |
| BA                           | 0.021               | 0.099                    | 0.000              | 0.027                         | 0.078                          | 0.112                  | 0.098                   | 0.173                    | 0.095                   |

732

733

734 **Table 2:** Pianka's measure of niche overlap (Pianka 1973) among Barombi Mbo cichlid species.  
735 Values range from 0-1, with 0 being no niche overlap and 1 being complete niche overlap.

|                                | <i>Konia dikume</i> | <i>Konia eisentrauti</i> | <i>Myaka myaka</i> | <i>Sarotherodon linnellii</i> | <i>Sarotherodon steinbachi</i> | <i>Pungu maclareni</i> | <i>Stomatepia mongo</i> | <i>Stomatepia mariae</i> |
|--------------------------------|---------------------|--------------------------|--------------------|-------------------------------|--------------------------------|------------------------|-------------------------|--------------------------|
| <i>Konia eisentrauti</i>       | 0.926               |                          |                    |                               |                                |                        |                         |                          |
| <i>Myaka myaka</i>             | 0.992               | 0.928                    |                    |                               |                                |                        |                         |                          |
| <i>Sarotherodon linnellii</i>  | 0.988               | 0.946                    | 0.996              |                               |                                |                        |                         |                          |
| <i>Sarotherodon steinbachi</i> | 0.840               | 0.791                    | 0.846              | 0.847                         |                                |                        |                         |                          |
| <i>Pungu maclareni</i>         | 0.925               | 0.894                    | 0.932              | 0.934                         | 0.838                          |                        |                         |                          |
| <i>Stomatepia mongo</i>        | 0.209               | 0.207                    | 0.211              | 0.213                         | 0.342                          | 0.236                  |                         |                          |
| <i>Stomatepia mariae</i>       | 0.919               | 0.894                    | 0.921              | 0.935                         | 0.910                          | 0.909                  | 0.270                   |                          |
| <i>Stomatepia pindu</i>        | 0.947               | 0.887                    | 0.954              | 0.951                         | 0.899                          | 0.906                  | 0.377                   | 0.920                    |

736

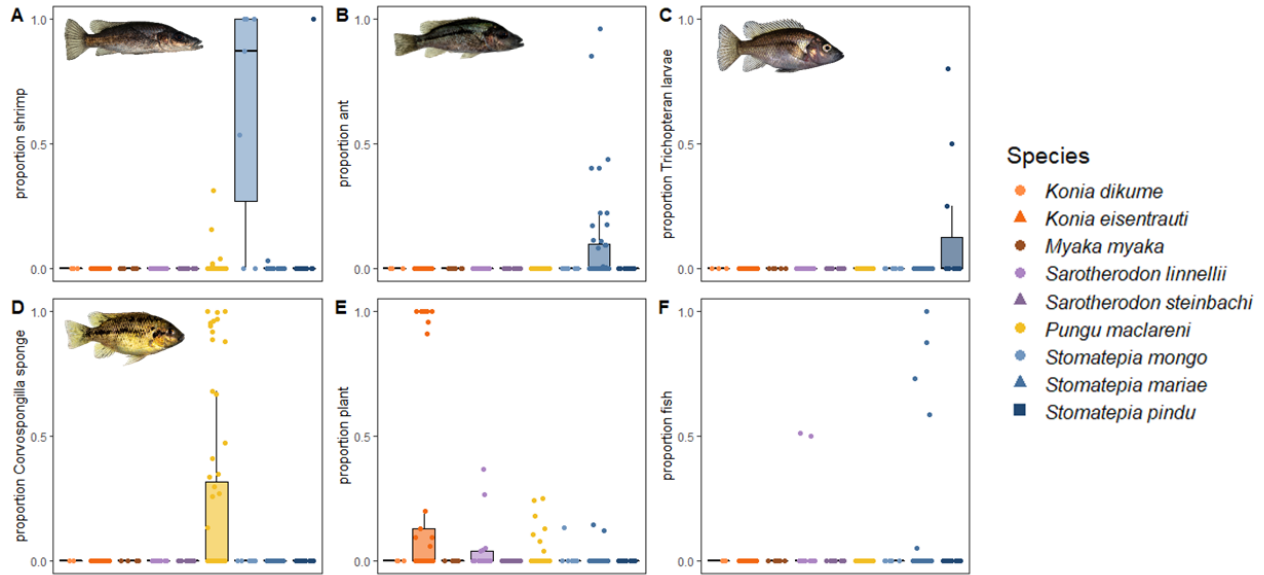

737  
738 **Figure 1:** Box and whisker plots displaying the proportions of A) shrimp B) ants, C)  
739 Trichopteran larvae, D) *Corvospongilla* sponge, E) plant tissue, and F) fish found in each  
740 species' stomachs. Total sample was 203 individuals collected in 2010 and 2016 from multiple  
741 sites around the lake.  
742

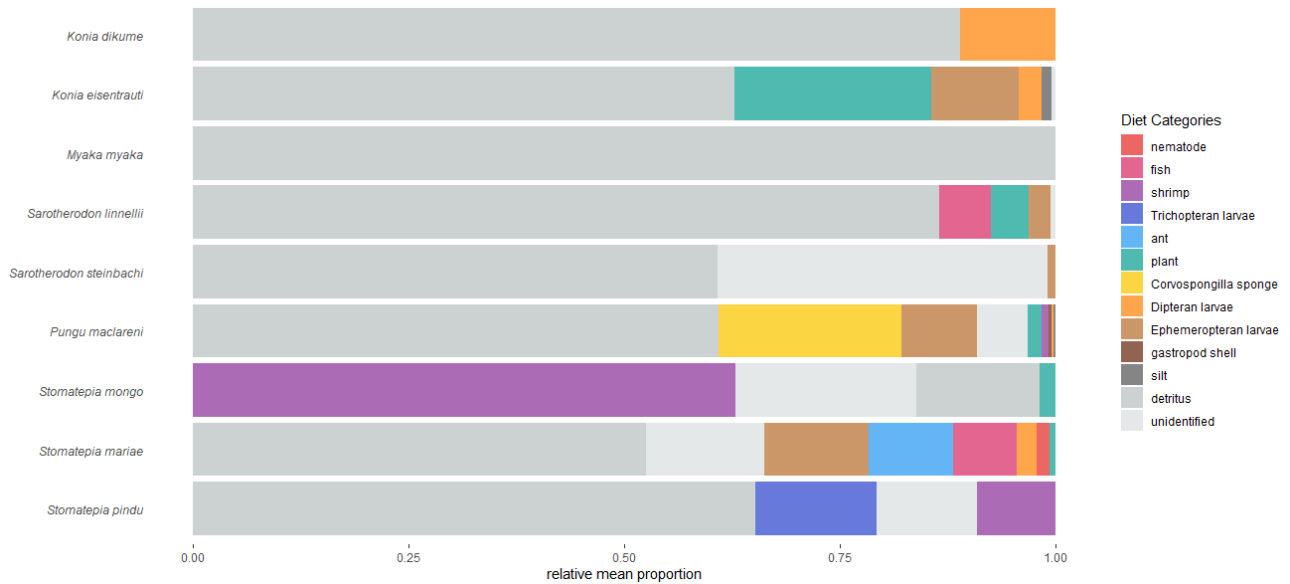

743  
744 **Figure 2:** Dietary profiles of Barombi Mbo cichlids by prey item proportion. Each color  
745 represents a different dietary component. Bar length is based on the average proportion of each  
746 prey item.  
747

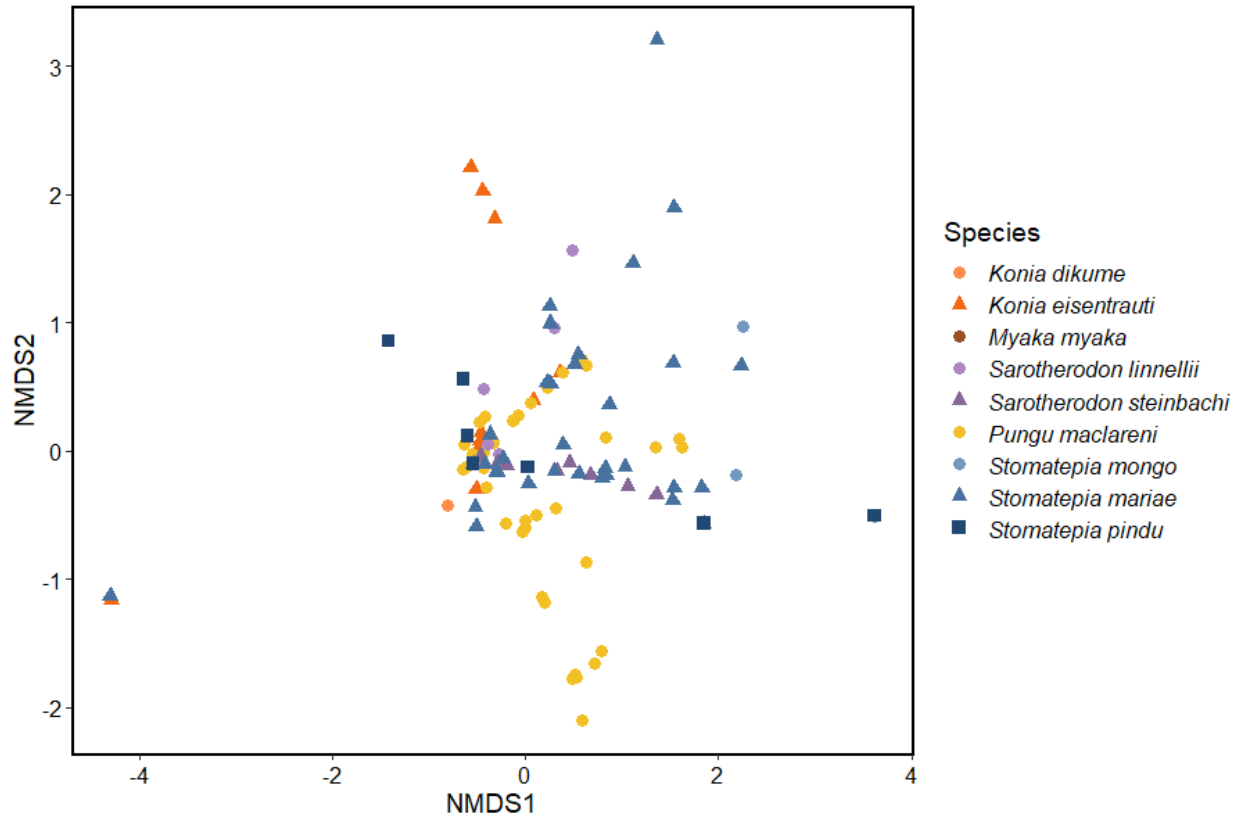

748

749 **Figure 3:** Non-metric multidimensional scaling (NMDS) ordination of dietary item proportions  
750 for nine of the eleven Barombi Mbo cichlids. Ordination is based on Bray-Curtis similarity  
751 index (stress = 0.103).  
752

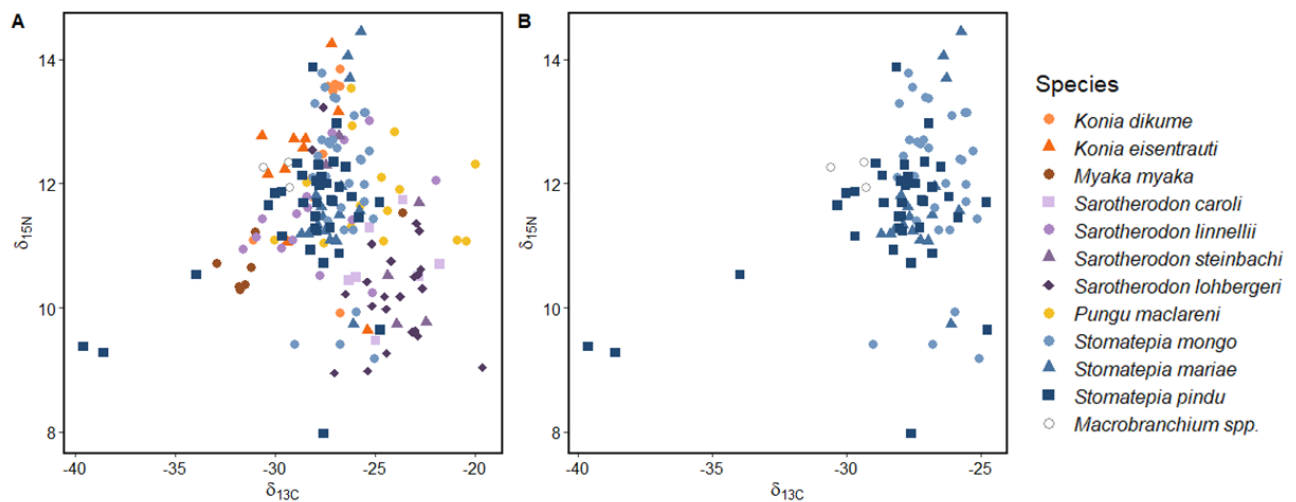

753

754 **Figure 4:** Scatterplots of  $\delta^{13}\text{C}$  and  $\delta^{15}\text{N}$  isotopic values for A) all eleven Barombi Mbo cichlids  
755 and B) only *Stomatepia* species.  $\delta^{13}\text{C}$  offers insight into ultimate carbon source (littoral vs  
756 pelagic) while  $\delta^{15}\text{N}$  values describe relative trophic position.
